# Supplementary material for: The Use of a Thermal Process to Produce Black Garlic: Differences in the Physicochemical and Sensory Characteristics Using Seven Varieties of Fresh Garlic
Source: MDPI journal article supplement (doi:10.3390/foods10112703), 2021-11-05
Supplement: s1 [file s1]

---

Article

# Supplementary material: Variety and ageing process as factors influencing selected physicochemical and sensory characteristics of black garlic

Jan Bedrníček<sup>1\*</sup>, Ivana Laknerová<sup>2</sup>, František Lorenc<sup>1</sup>, Priscila Probio de Moraes<sup>4</sup>, Markéta Jarošová<sup>3</sup>, Eva Samková<sup>1</sup>, Jan Tríska<sup>5</sup>, Naděžda Vrchotová<sup>5</sup>, Jaromír Kadlec<sup>1</sup>, and Smetana Pavel<sup>1</sup>

<sup>1</sup> University of South Bohemia in České Budějovice, Faculty of Agriculture, Department of Food Biotechnologies and Agricultural Products' Quality, Studentská 1668, 370 05 České Budějovice, Czech Republic; bedrnj00@zf.jcu.cz (J.B.); kadlec@zf.jcu.cz (J.K.); samkova@zf.jcu.cz (E.S.); smetana@zf.jcu.cz (P.S.); lorenf00@zf.jcu.cz (F.L.).

<sup>2</sup> Food Research Institute Prague, Radiová 1285/7, 102 00 Praha 10 – Hostivař, Czech Republic; ivana.laknerova@vupp.cz (I.L.)

<sup>3</sup> University of South Bohemia in České Budějovice, Faculty of Agriculture, Department of Plant Production, Na Sádkách 1780, 370 05 České Budějovice, Czech Republic; jarosm08@zf.jcu.cz (M.J)

<sup>4</sup> University of Campinas, School of Food Engineering, Department of Food Science, Monteiro Lobato n°80, 13083-862 Campinas, São Paulo, Brazil; priscilaprobio-moraes@gmail.com (P.P.M.)

<sup>5</sup> Global Change Research Institute CAS, 603 00 Brno, Czech Republic; triska.j@czechglobe.cz (J.T.); vrchotova.n@czechglobe.cz (N.V.)

\* Correspondence: bedrnj00@zf.jcu.cz; Tel.: + 420 721 657 114

**Table S1.** Correlation analysis of properties of fresh garlic and black garlic.

|                            |          | Properties of Black garlic |       |       |                        |       |       |                     |       |       |       |                  |       |         |       |                        |                       |
|----------------------------|----------|----------------------------|-------|-------|------------------------|-------|-------|---------------------|-------|-------|-------|------------------|-------|---------|-------|------------------------|-----------------------|
|                            |          | Basic analyses             |       |       | Antioxidant properties |       |       | Physical properties |       |       |       | Sensory analysis |       |         |       |                        |                       |
| Parameter                  |          | Moisture                   | pH    | TSS   | DPPH                   | FRAP  | TPC   | Hardness            | L*    | a*    | b*    | Color            | Odor  | Texture | Taste | Garlic aroma intensity | Overall acceptability |
| Properties of fresh garlic | Moisture | 0,81                       | 0,33  | -0,59 | 0,11                   | 0,43  | -0,44 | -0,43               | 0,56  | 0,04  | -0,01 | 0,26             | -0,62 | 0,23    | 0,11  | -0,18                  | 0,22                  |
|                            | pH       | -0,81                      | -0,10 | 0,69  | 0,47                   | 0,22  | 0,56  | 0,19                | -0,82 | 0,17  | 0,15  | -0,22            | 0,21  | 0,31    | -0,06 | 0,26                   | 0,20                  |
|                            | TSS      | -0,89                      | -0,20 | 0,39  | -0,05                  | -0,34 | 0,51  | 0,27                | -0,78 | 0,24  | 0,28  | -0,11            | 0,34  | -0,13   | 0,06  | 0,30                   | -0,04                 |
|                            | DPPH     | 0,42                       | -0,07 | 0,18  | 0,59                   | 0,69  | 0,14  | 0,01                | 0,35  | -0,40 | -0,51 | -0,25            | -0,08 | 0,31    | -0,26 | 0,17                   | 0,04                  |
|                            | FRAP     | 0,08                       | 0,42  | -0,28 | 0,39                   | 0,35  | -0,59 | -0,06               | -0,03 | 0,41  | 0,39  | -0,40            | -0,55 | 0,18    | -0,56 | -0,10                  | -0,02                 |
|                            | TPC      | 0,20                       | -0,23 | -0,21 | 0,58                   | 0,62  | -0,05 | 0,33                | 0,28  | -0,16 | -0,21 | 0,02             | -0,68 | -0,22   | -0,62 | 0,43                   | -0,35                 |
|                            | Hardness | -0,31                      | -0,76 | 0,80  | 0,41                   | 0,28  | 0,33  | 0,77                | 0,11  | -0,68 | -0,64 | 0,23             | 0,08  | -0,37   | -0,51 | 0,19                   | -0,45                 |
|                            | L*       | 0,93                       | 0,37  | -0,47 | -0,45                  | -0,13 | -0,71 | -0,47               | 0,80  | -0,13 | -0,12 | 0,22             | -0,07 | 0,10    | 0,28  | -0,66                  | 0,16                  |
|                            | a*       | -0,23                      | 0,10  | 0,39  | -0,54                  | -0,56 | -0,30 | -0,09               | -0,14 | 0,07  | 0,19  | 0,39             | 0,37  | 0,03    | 0,40  | -0,74                  | 0,22                  |
|                            | b*       | -0,23                      | -0,53 | 0,54  | -0,43                  | -0,47 | 0,56  | 0,24                | 0,02  | -0,53 | -0,48 | 0,31             | 0,76  | -0,26   | 0,41  | 0,00                   | -0,10                 |

Values in the table represent correlation coefficients (r). Correlation coefficients highlighted in red color are statistically significant ( $P < 0.05$ ). TSS:

DPPH: 2,2-diphenyl-1-picrylhydrazyl; FRAP: ferric reducing antioxidant power; TPC: total polyphenol content; TSS: total soluble solids.
